# Supplementary material for: Synthesis, structure and magnetic properties of two new azido-CoII coordination architectures: From ferromagnetic coupling to single-chain-magnets
Source: Royal Society of Chemistry journal article supplement (doi:10.1039/c0dt00566e), 2010-01-01
Supplement: c0dt00566e.pdf [file c0dt00566e.pdf]

## ESI

# Synthesis, Structure and Magnetic Properties of Two New Azido-Co<sup>II</sup> Coordination Architectures: from Ferromagnetic Coupling to Single-Chain-Magnets

Bo-Wen Hu,<sup>a</sup> Jiong-Peng Zhao,<sup>a</sup> Qian Yang,<sup>a</sup> Xiao-Feng Zhang,<sup>a</sup> M. Evangelisti,<sup>c</sup> E. C. Sañudo\*<sup>b</sup> and Xian-He Bu\*<sup>a</sup>

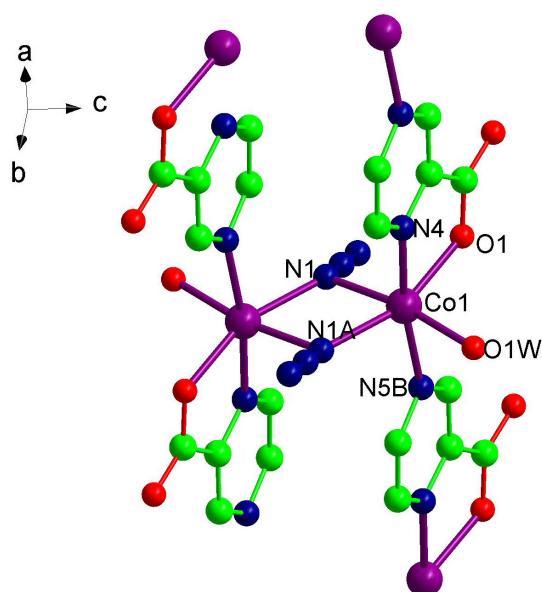

**Fig. 1S** The coordination environment of the Co<sup>II</sup> center in **1** (symmetry code: A  $-x+1, -y+1, -z+1$ ; B  $x-1, y, z$ ).

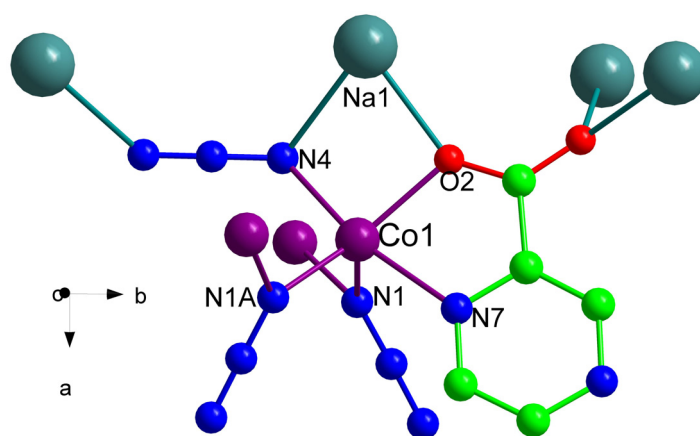

**Fig. 2S** The coordination environment of Co<sup>II</sup> and Na<sup>+</sup> centers in **2** (symmetry code: A  $x, -y+1, z+1/2$ ).

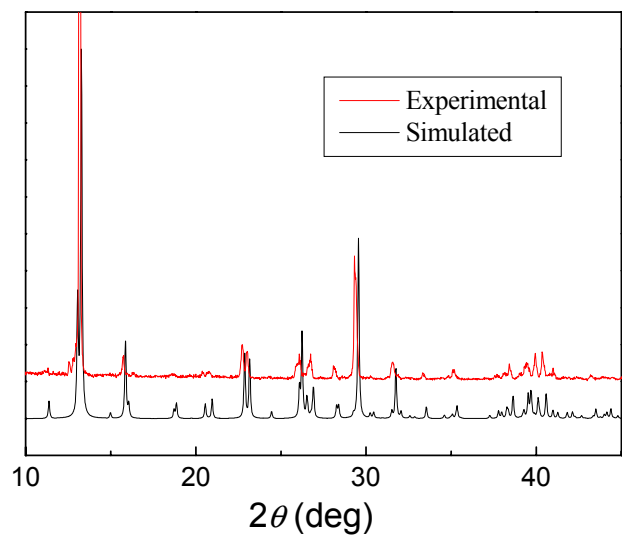

(a)

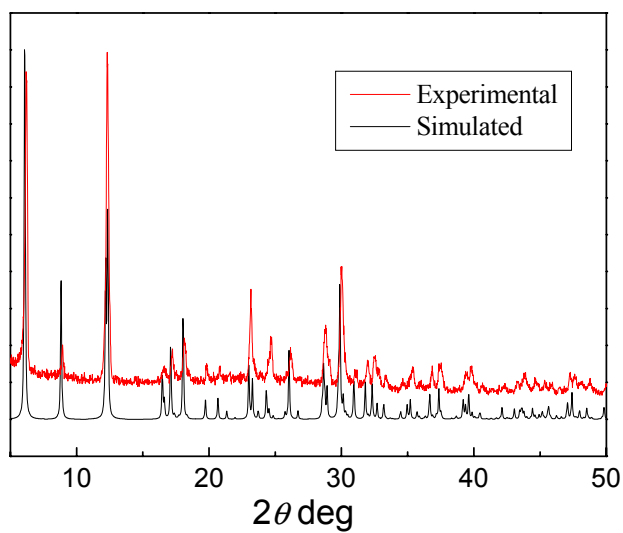

(b)

**Fig. 3S** XRPD patterns for **1** (a) and **2** (b).

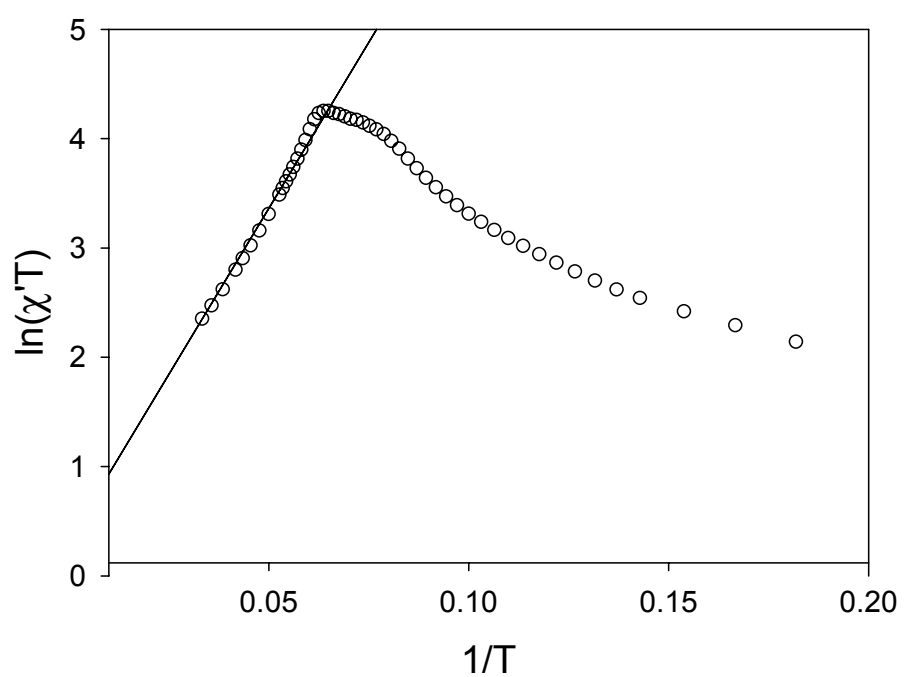

**Fig. 4S** Plot of  $\ln(\chi'T)$  vs.  $1/T$  for **2** (10 Hz oscillating frequency, 3 G ac field and zero dc field)

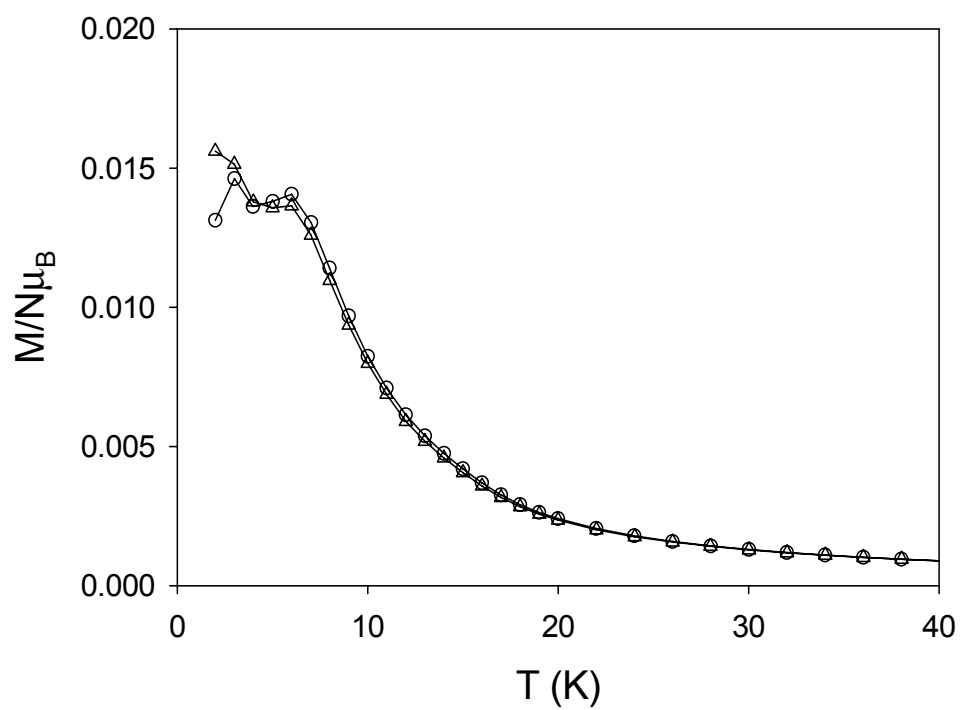

**Fig. 5S** ZFC/FC measurement for **2** at 50 G applied field.

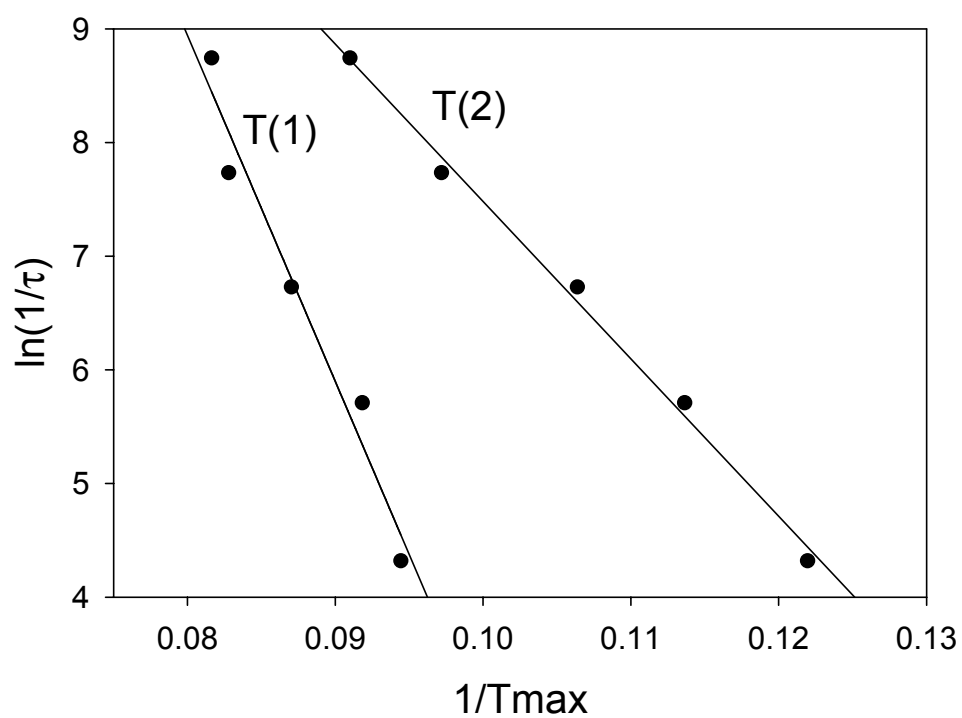

**Fig. 6S** Arrhenius plot for the two frequency dependent relaxation processes (T1 centred at 11.8 K and T2 centred at 9.5 K) observed for complex **2**. The solid lines are the best fit to the Arrhenius law. See text for fitting parameters.

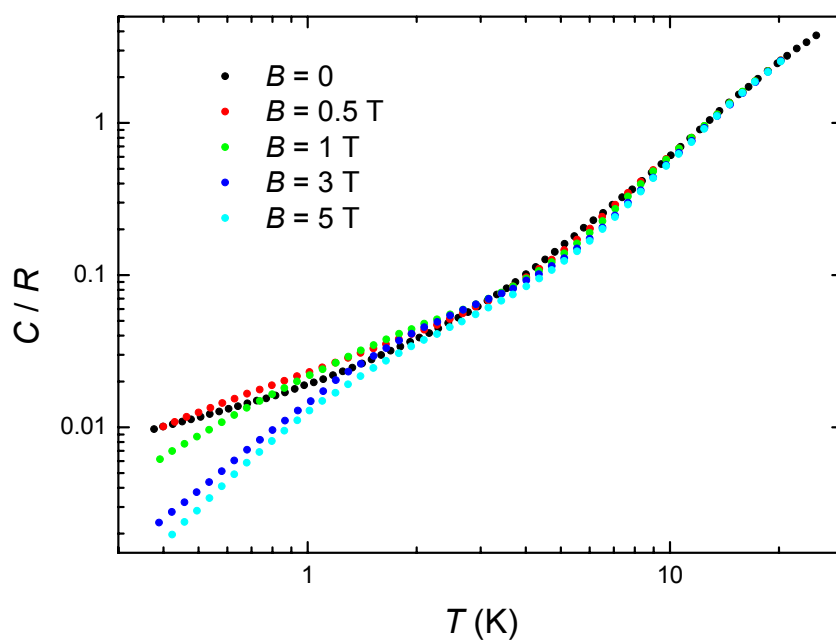

**Fig. 7S** Experimental heat capacity for complex 2 collected for several applied magnetic fields ( $B$ ), as labelled.
